# Supplementary material for: Kaposi’s Sarcoma-Associated Herpesvirus ORF7 Is Essential for Virus Production
Source: MDPI journal article supplement (doi:10.3390/microorganisms9061169), 2021-05-28
Supplement: s1 [file s1]

# Supplementary Figure S1

(original data of Figure 1c)

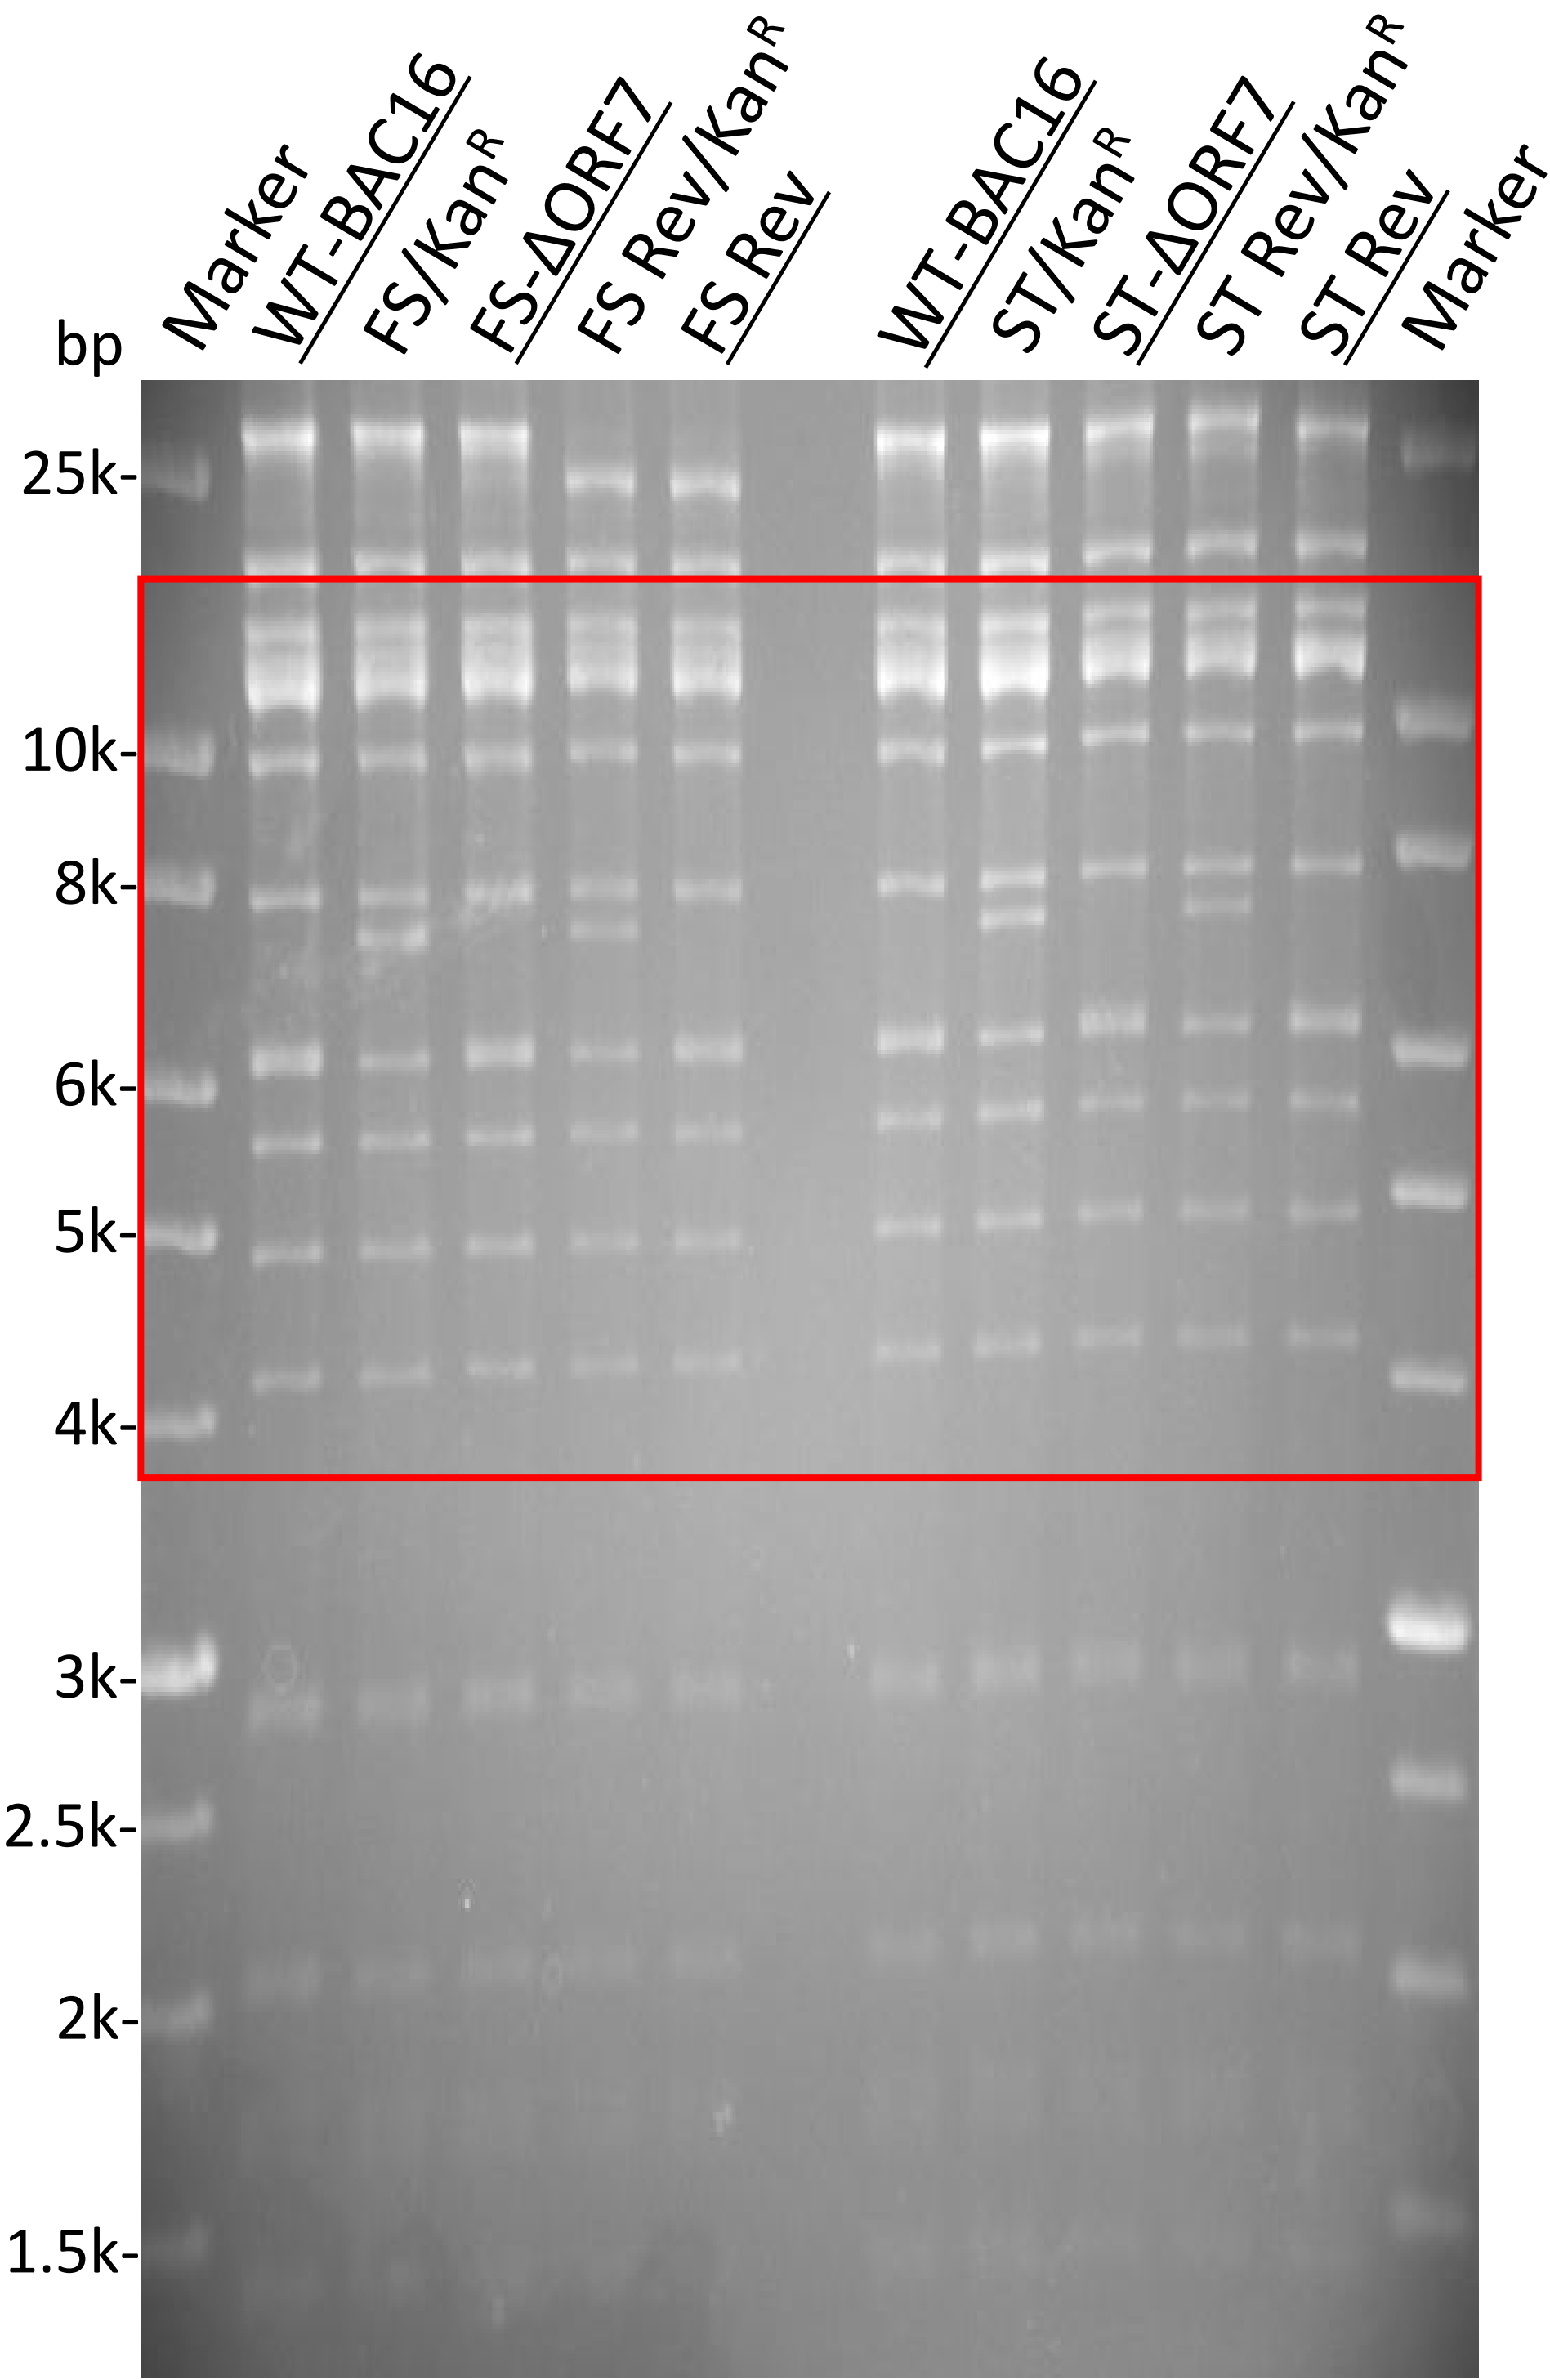

# Supplementary Figure S2

(a) ORF7 expression does not influence the lytic replication of KSHV.

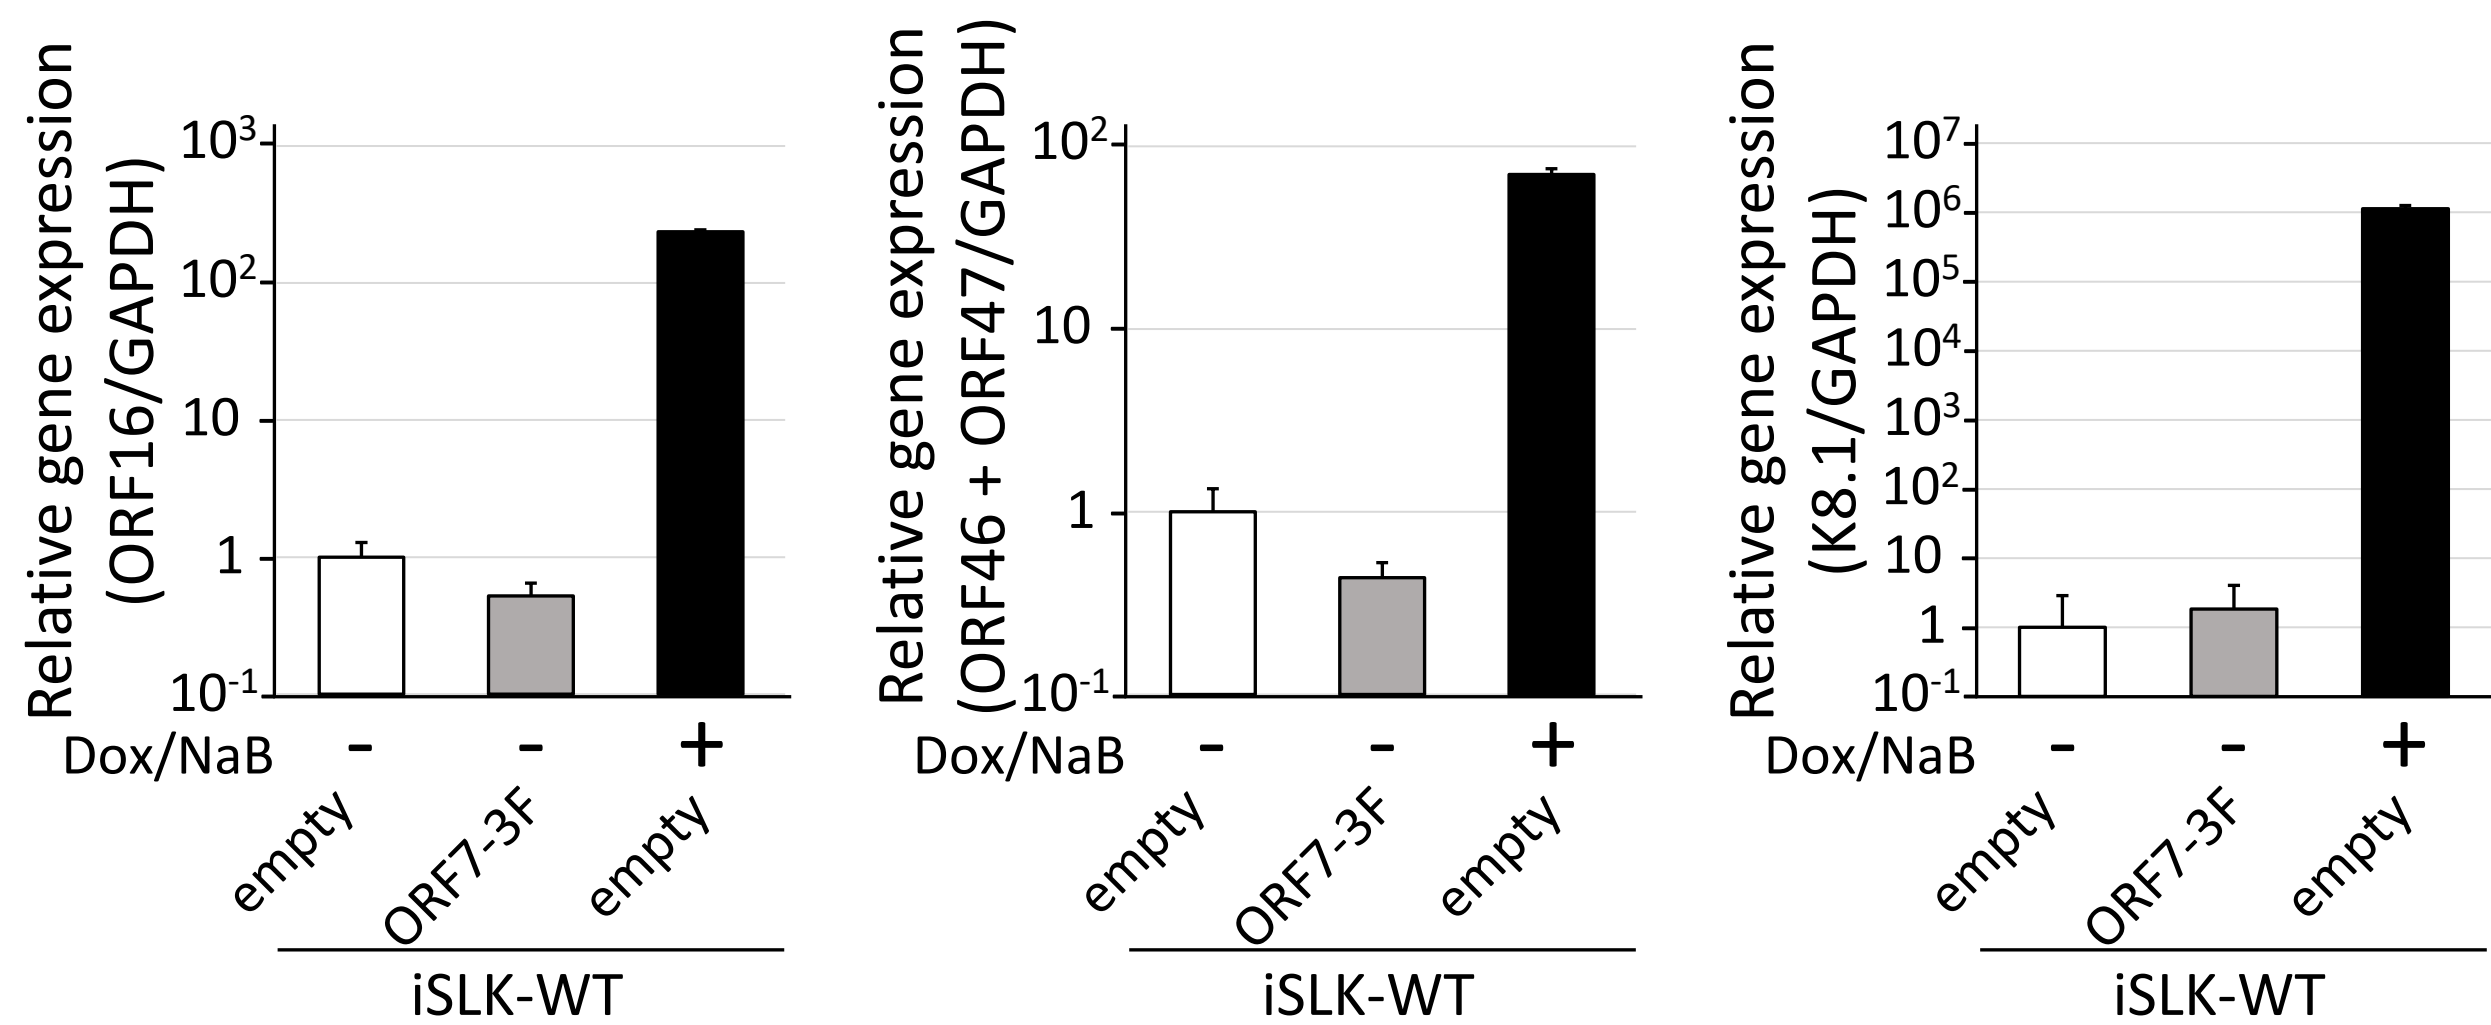

iSLK cells harboring WT-KSHV-BAC16 (iSLK-WT) were transfected with ORF7-3xFLAG (or empty) plasmid and cultured for 72 h. As the positive control, iSLK-WT cells were cultured for 72 h with medium containing 8  $\mu$ g/mL Dox and 1.5 mM NaB to induce lytic replication. At 72 h post-transfection (or treatment), total RNA were purified from harvested cells were subjected to RT real-time PCR. The mRNA expression levels of KSHV lytic genes, ORF16 (immediate early), ORF46 and ORF47 (early), and K8.1 (late) were normalized by GAPDH mRNA. The values obtained from Dox- and NaB-untreated and empty plasmid-transfected iSLK-WT cells were defined as 1.0.

(b) original data of Fig.3

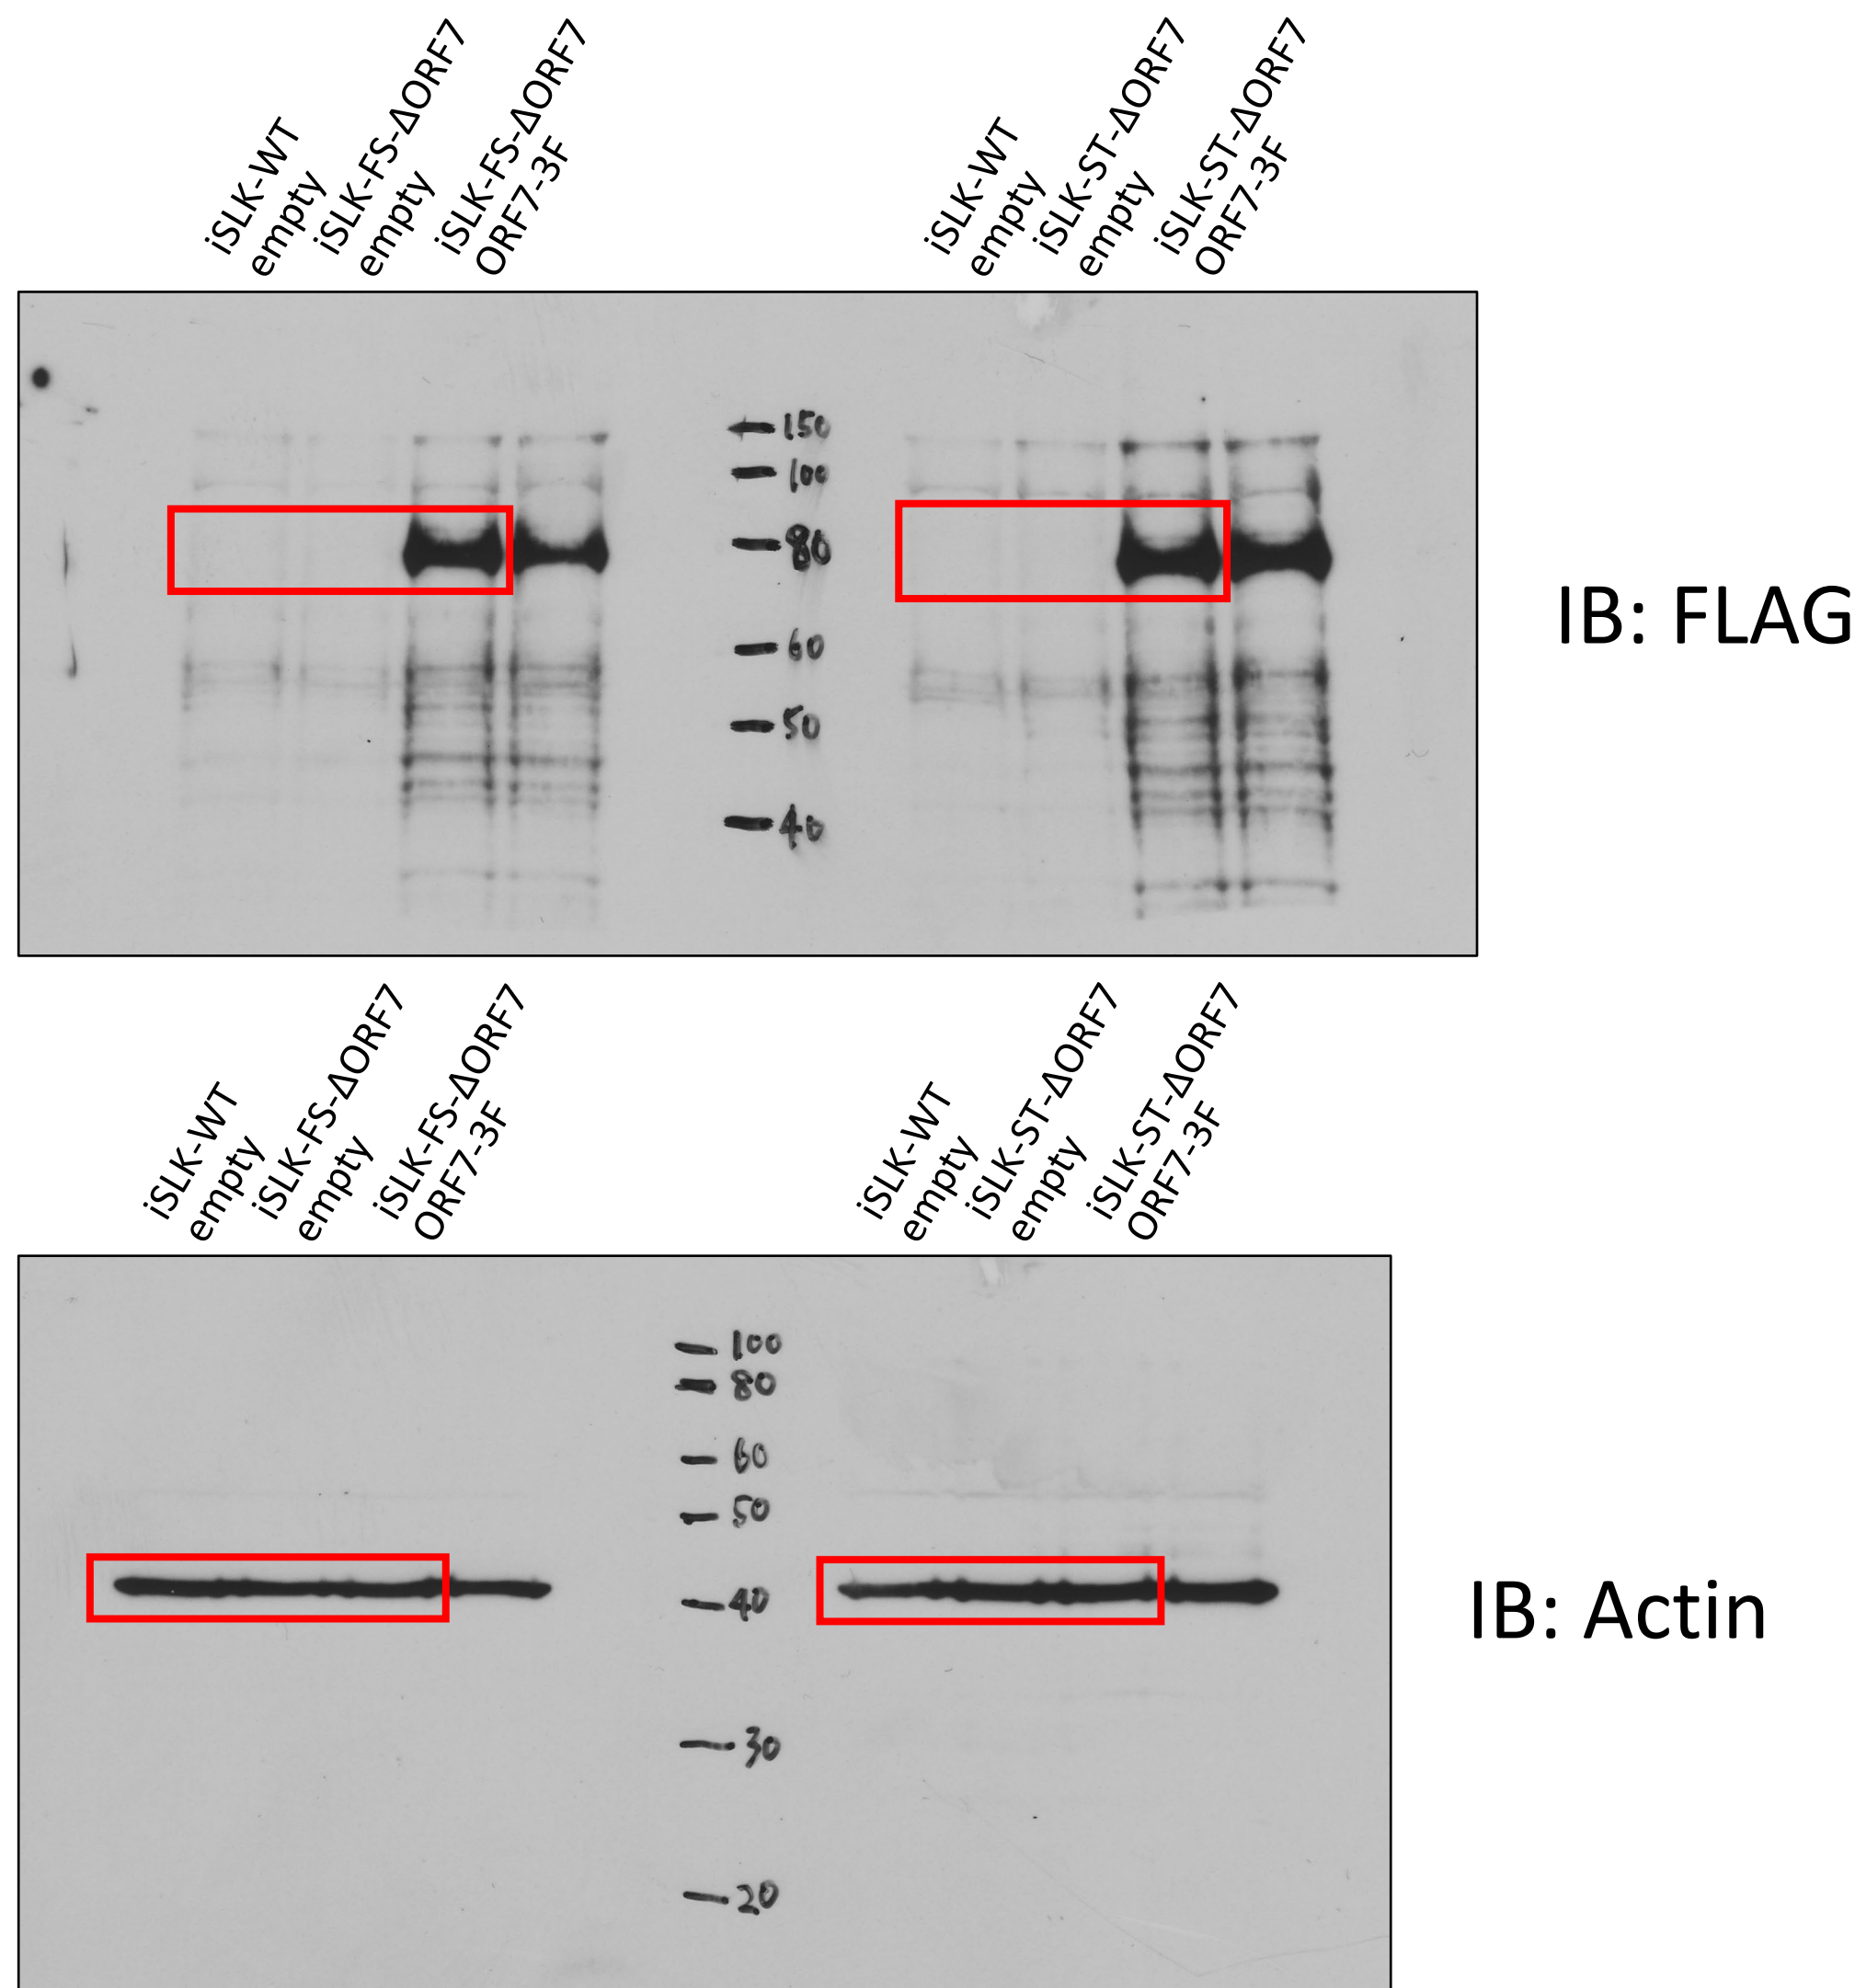



Supplementary Figure S3  
(original data of Figure 5a )

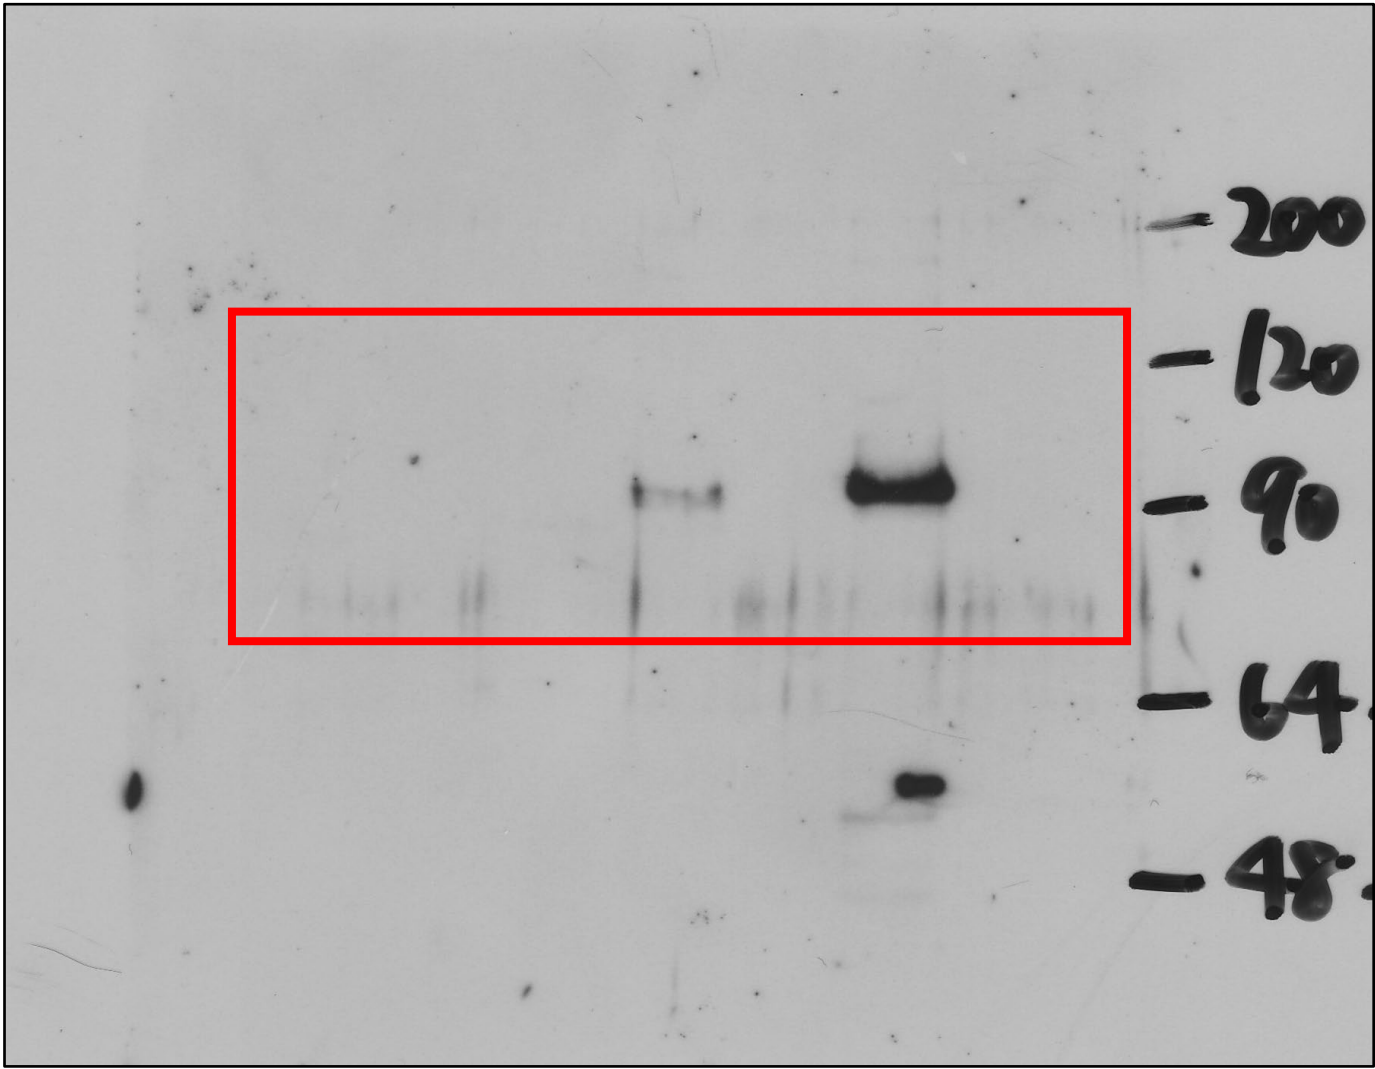

Pd: S  
IB: FLAG

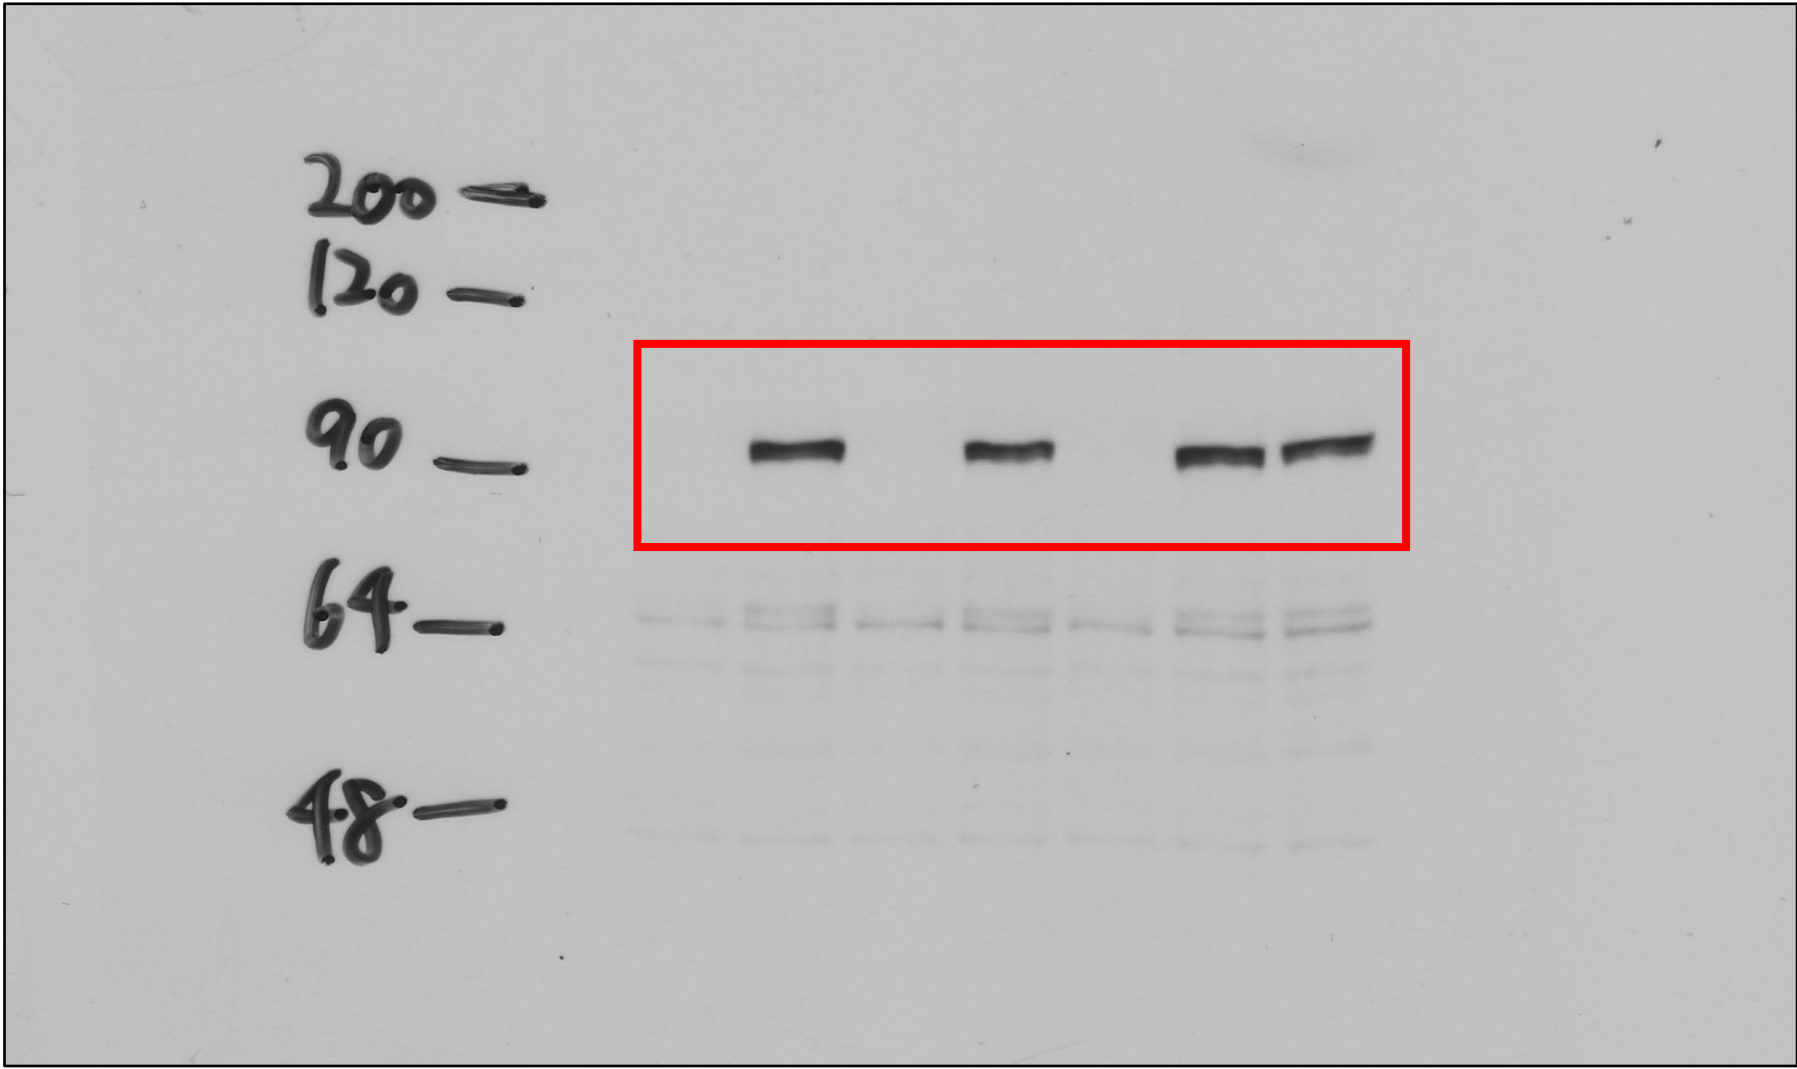

Input  
IB: FLAG

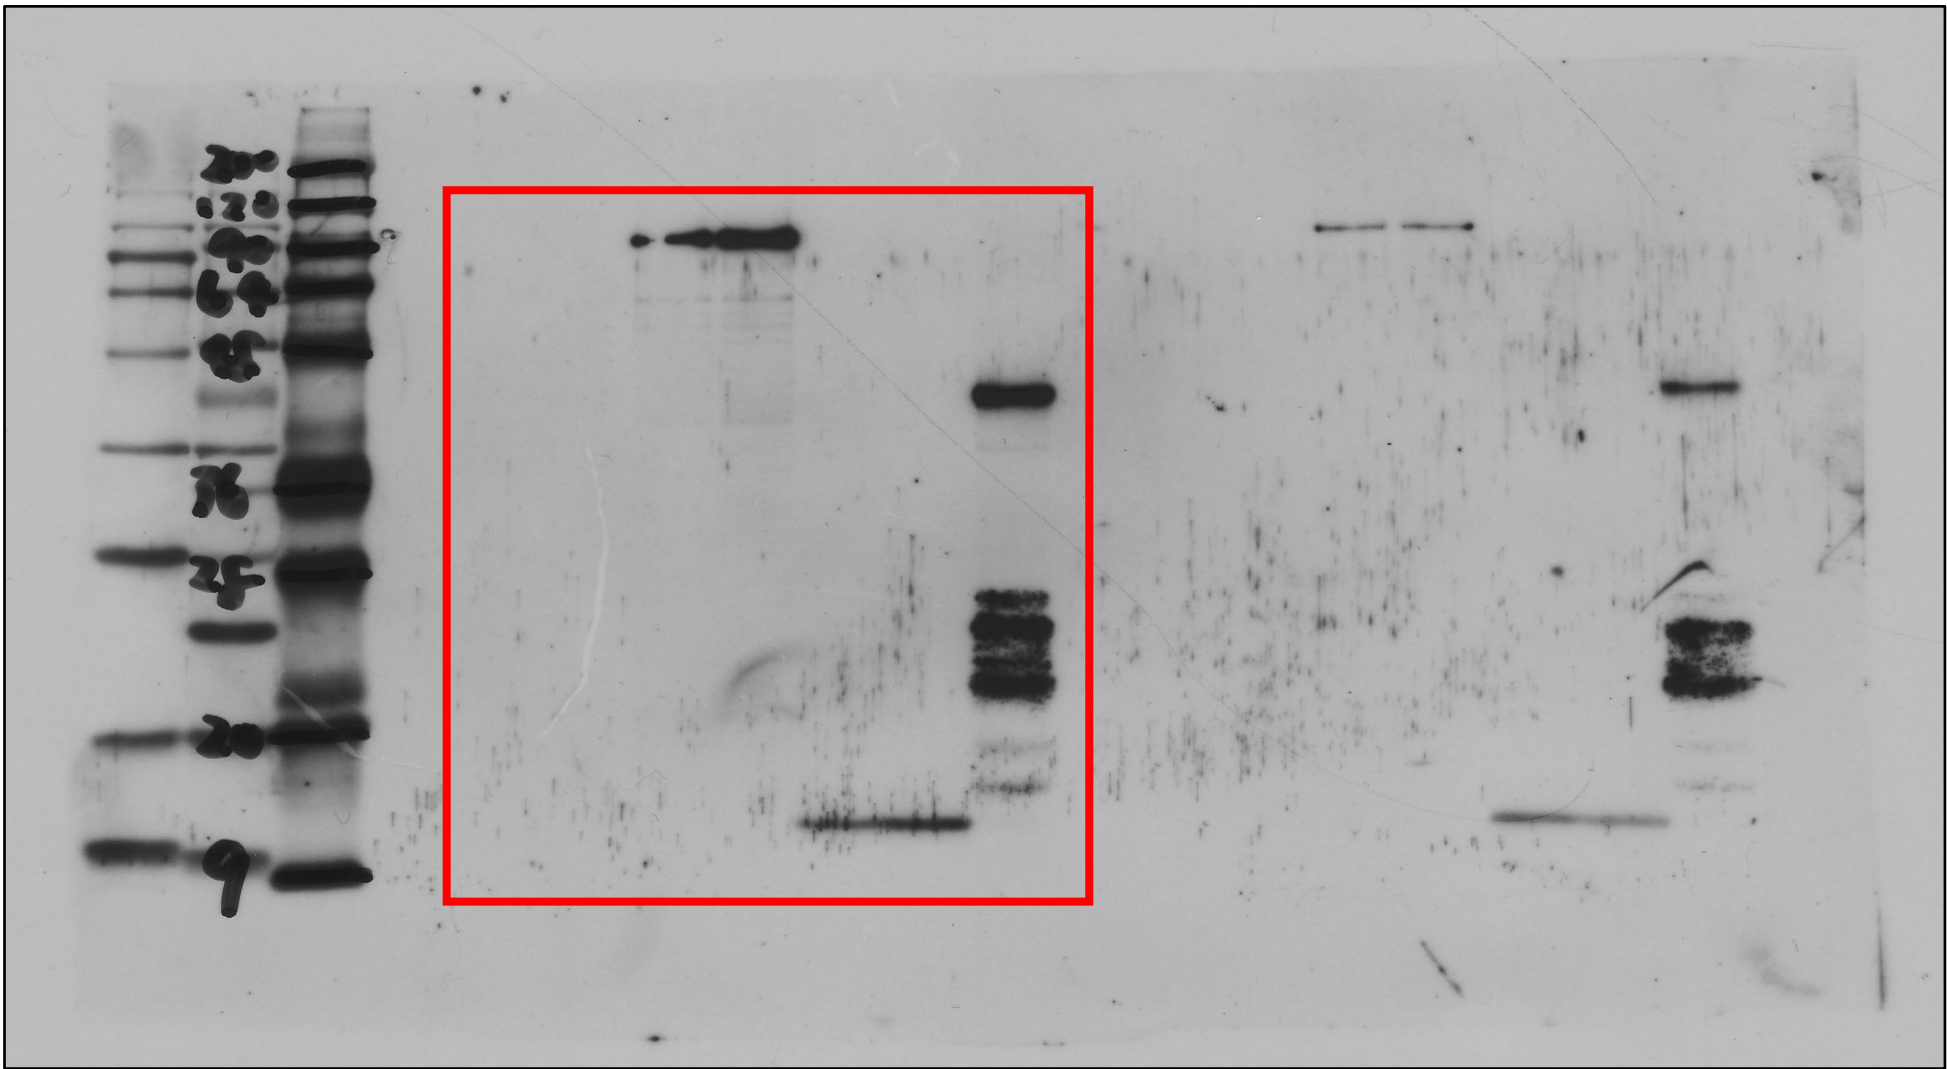

Pd: S  
IB: S



# Supplementary Figure S4 (original data of Figure 5b)

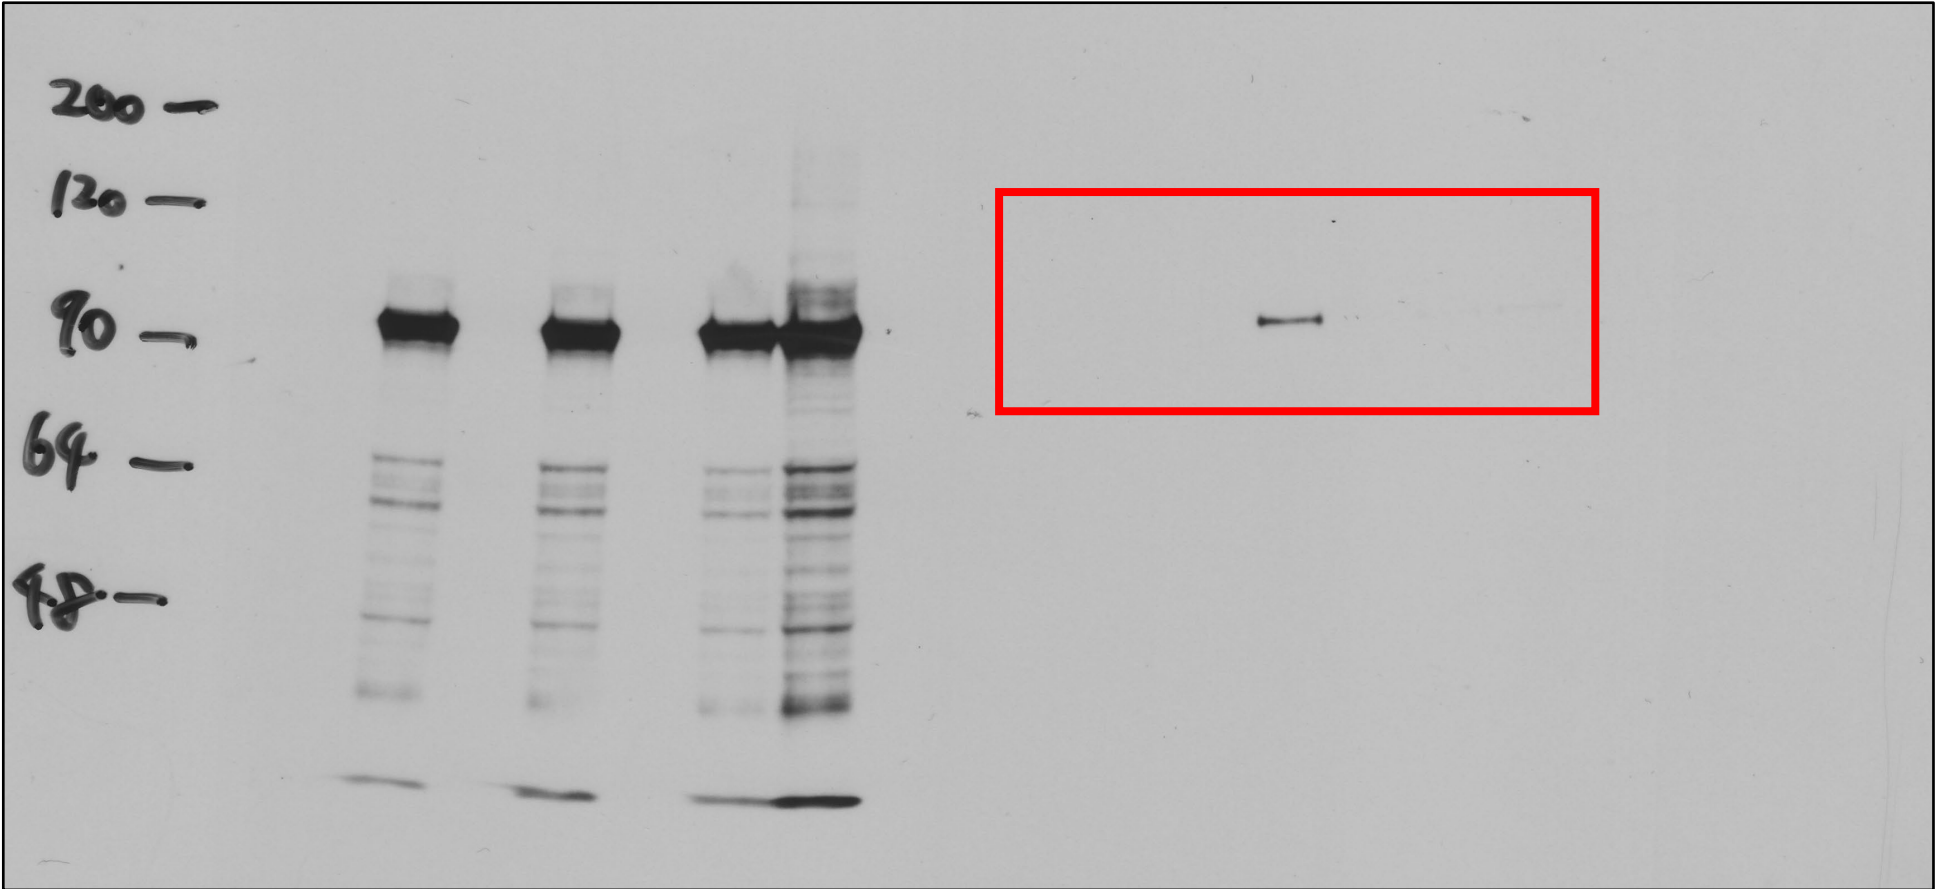

Pd: S  
IB: HA

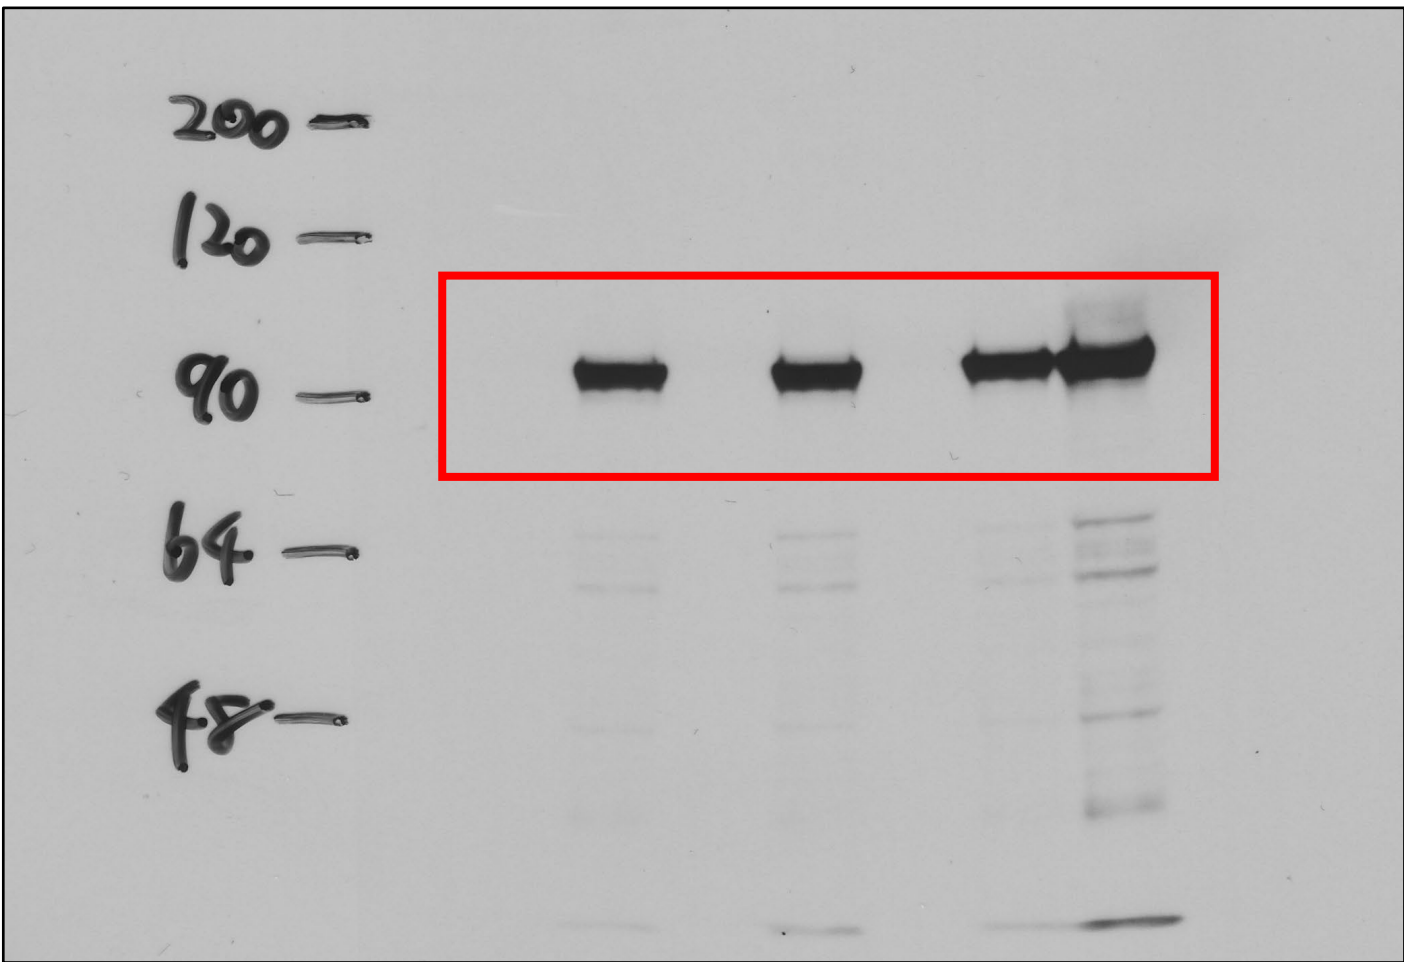

Input  
IB: HA

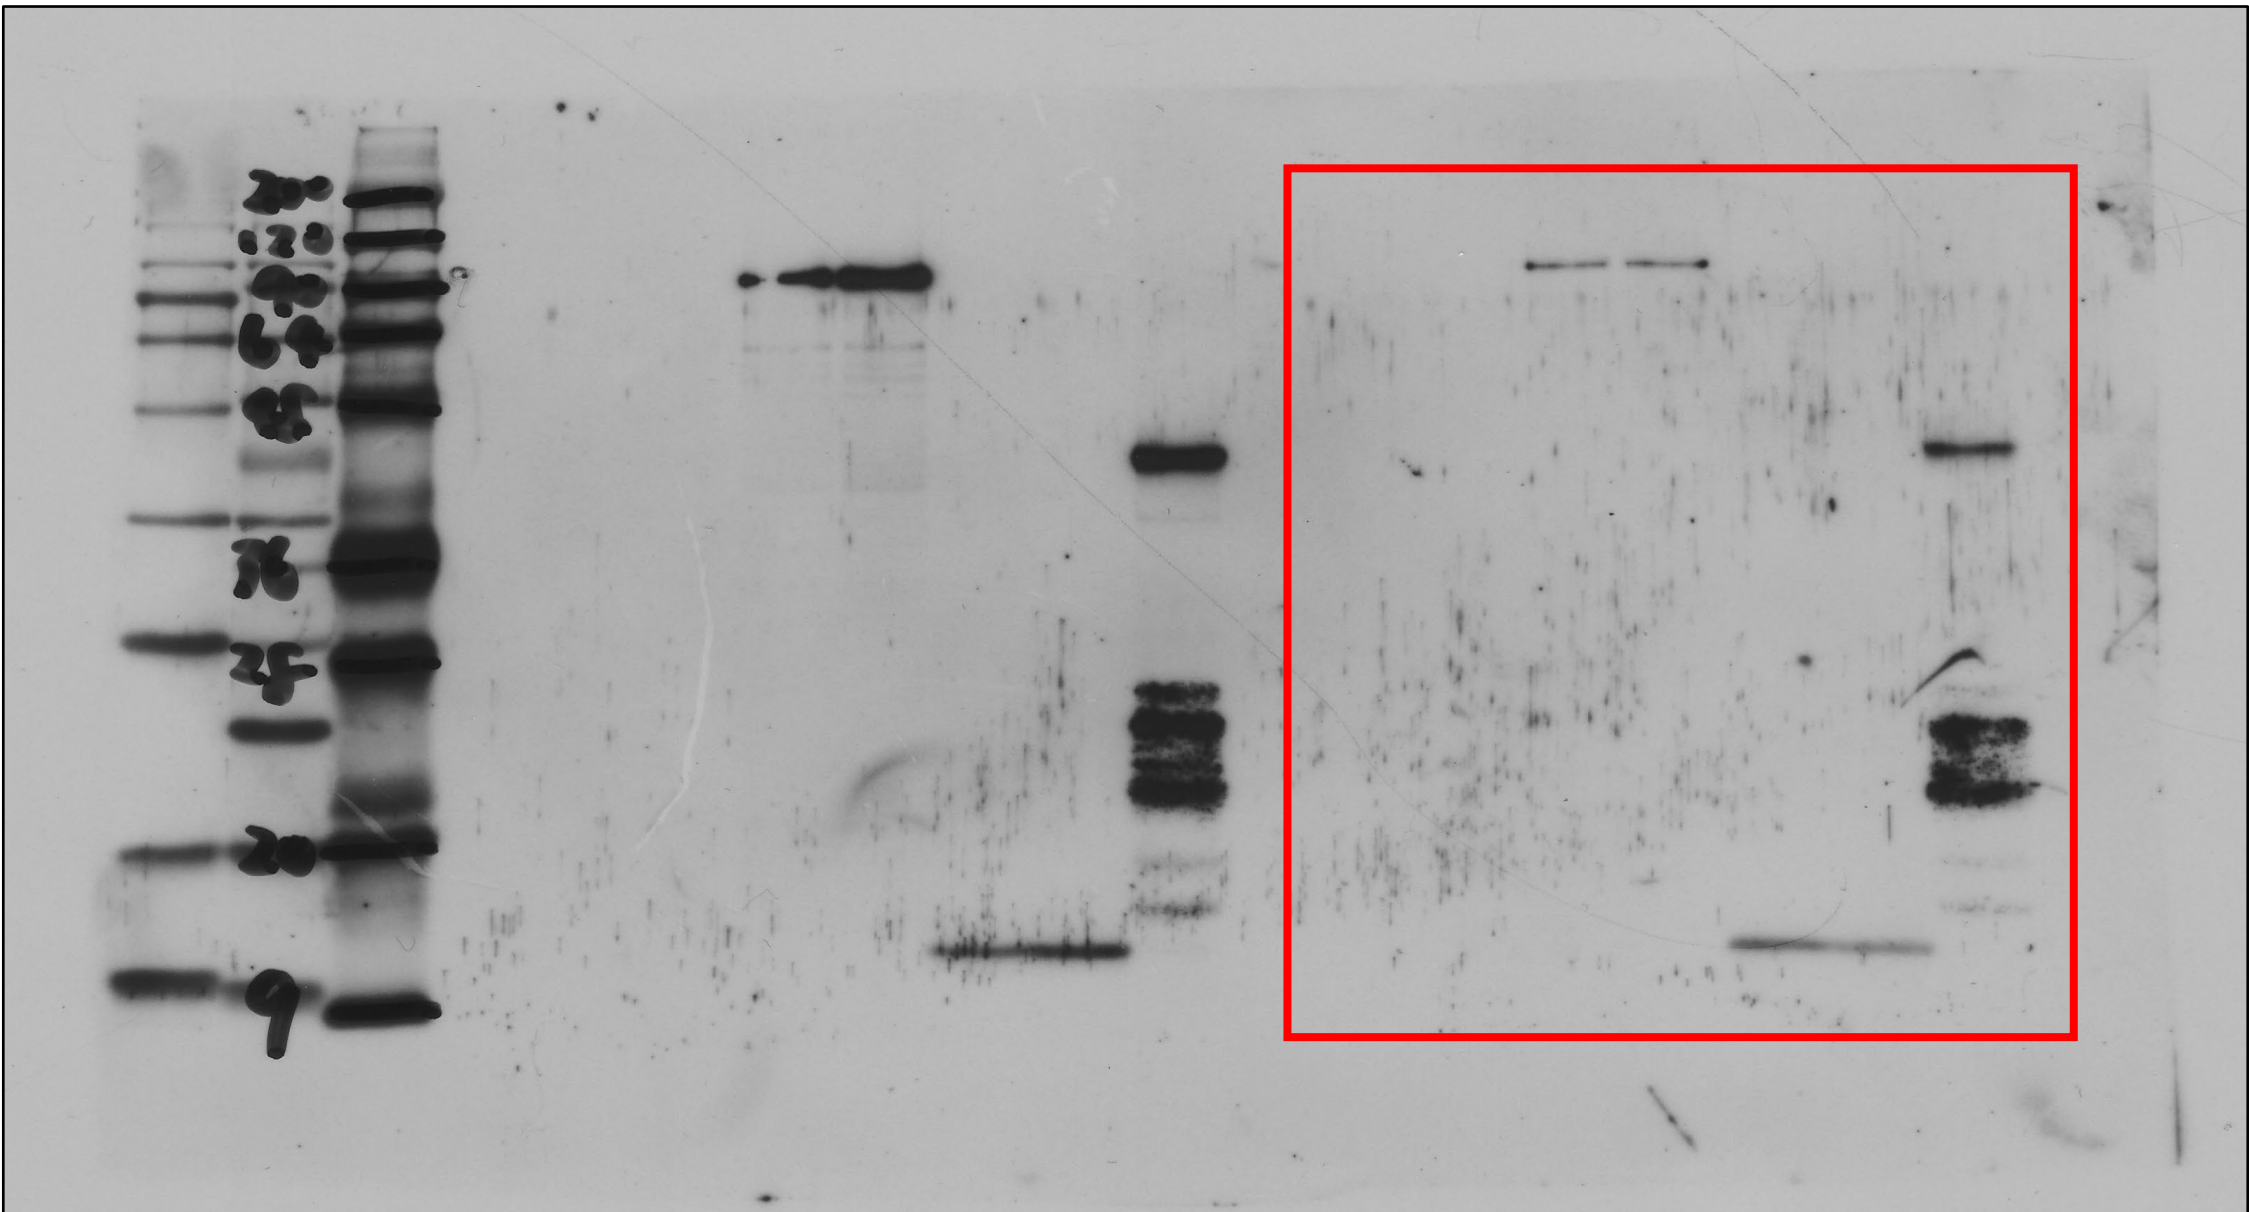

Pd: S  
IB: S



Supplementary Figure S5  
(original data of Figure 5c)

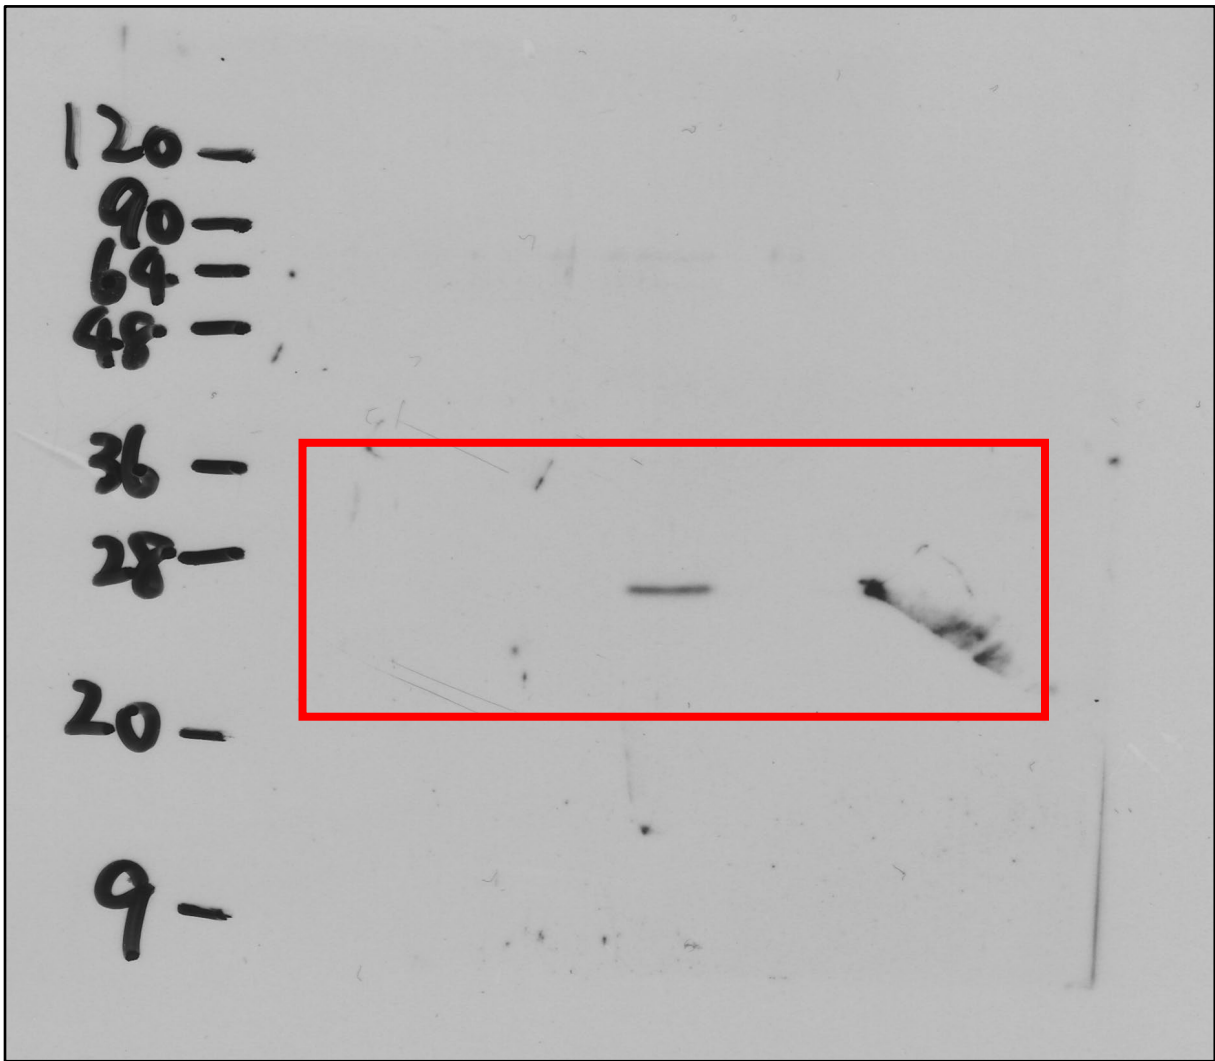

Pd: S  
IB: HA

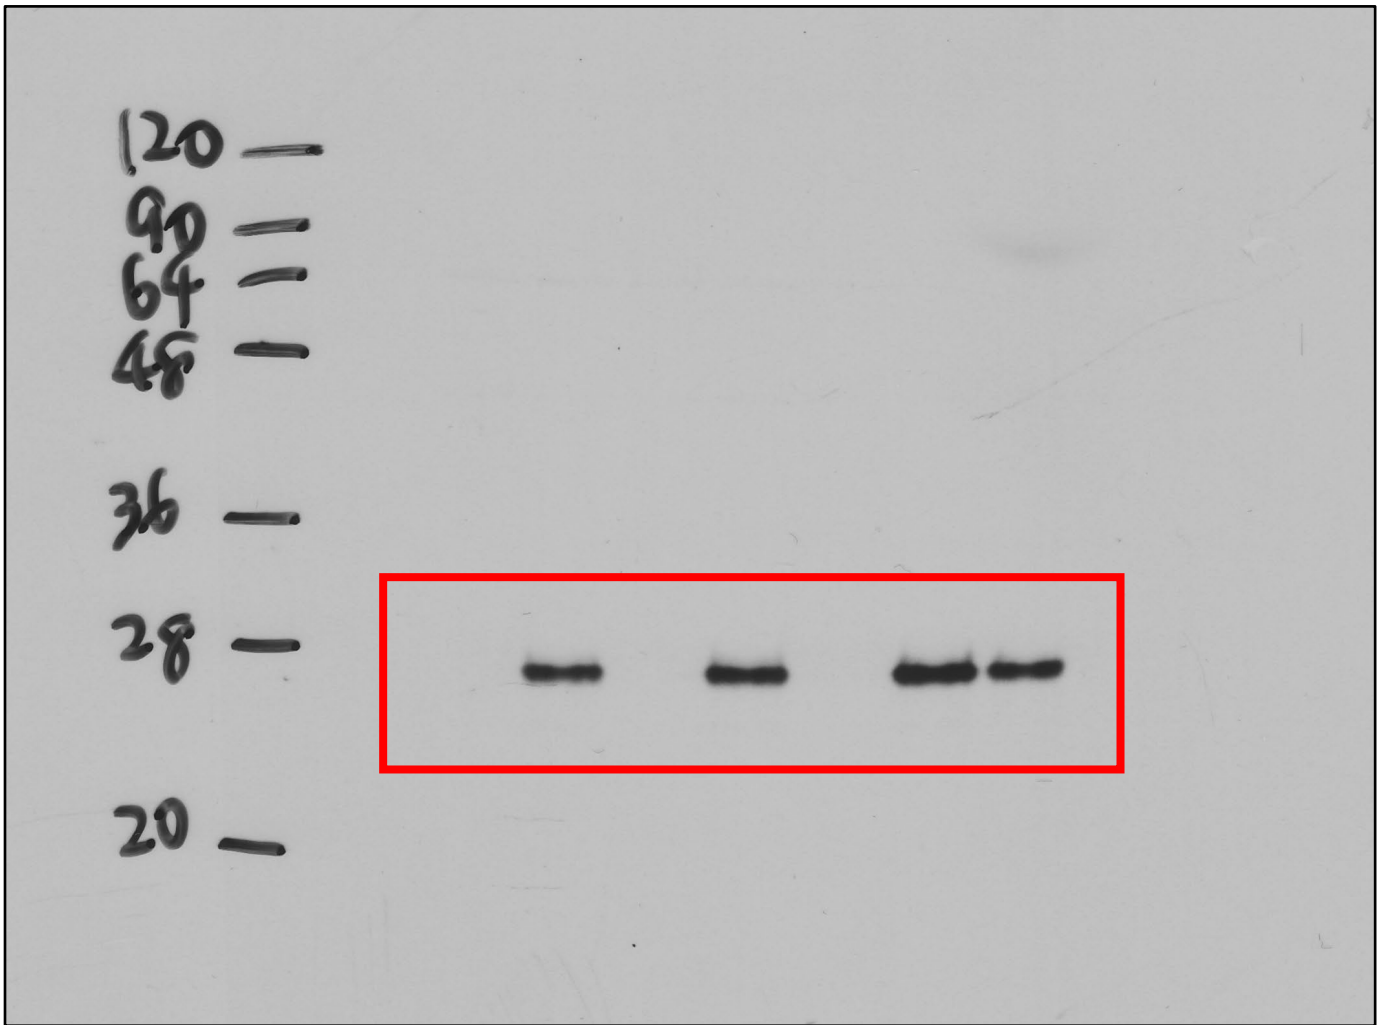

Input  
IB: HA

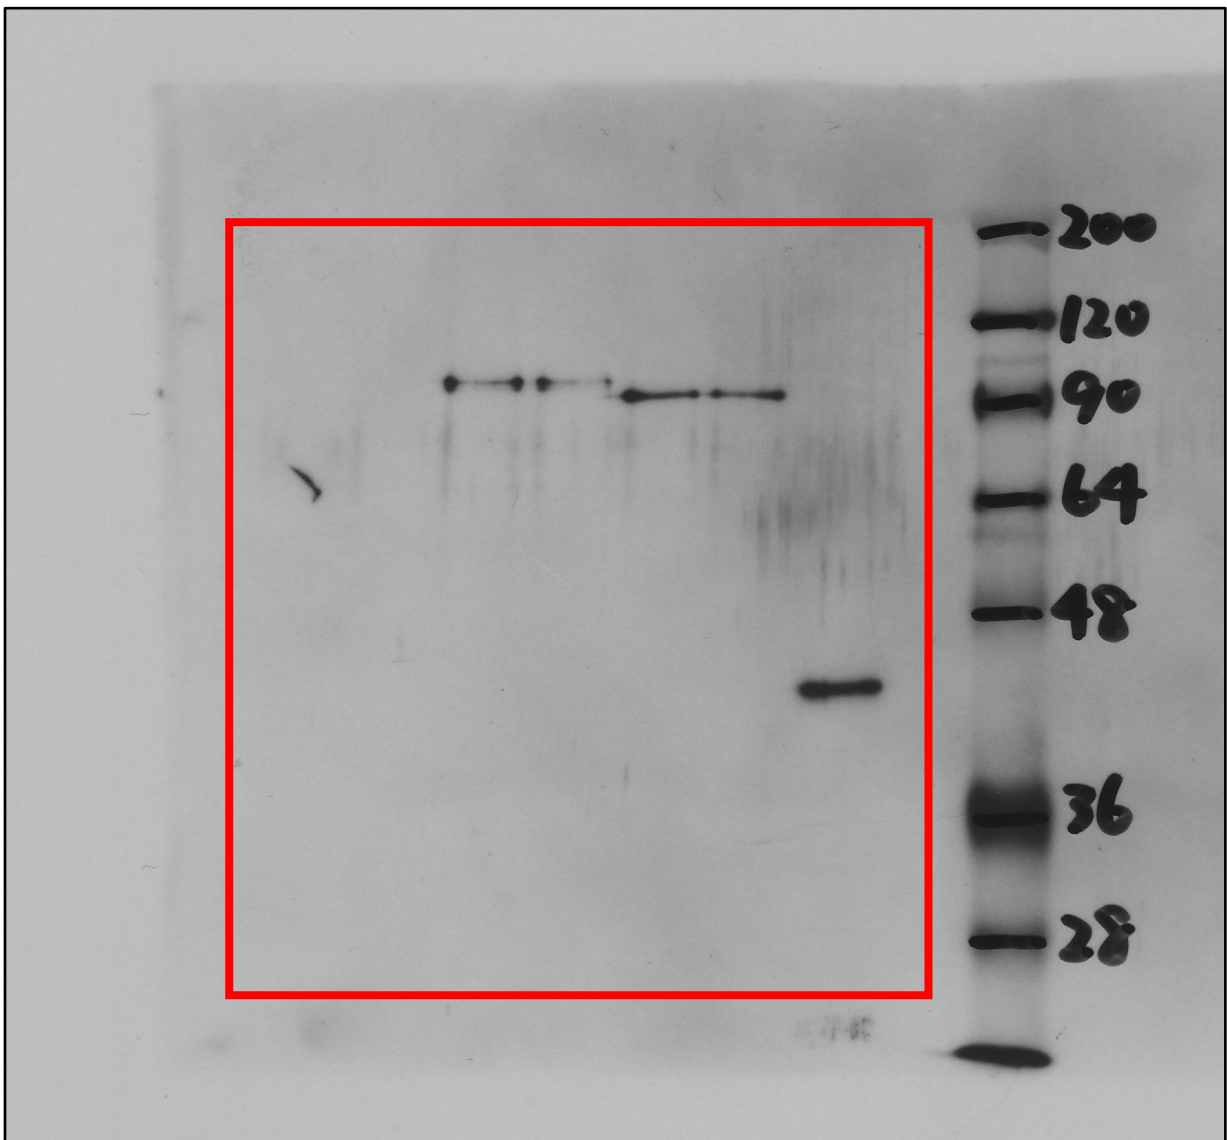

Pd: S  
IB: S
